# Supplementary material for: Polarization-directed growth of single-crystalline silicon nanostructures
Source: Royal Society of Chemistry journal article supplement (doi:10.1039/d5nr04514b), 2026-01-01
Supplement: d5nr04514b1.pdf [file d5nr04514b1.pdf]

## **Supporting Information**

### **Polarization-Directed Growth of Single-Crystalline Silicon Nanostructures**

Jin Hu<sup>1</sup>, Jin Qin<sup>1</sup>, and Zhikun Liu<sup>1,\*</sup>

<sup>1</sup> School of Mechanical Engineering, Shanghai Jiao Tong University, Shanghai  
200240, China

\* Author to whom correspondence should be addressed: [liuzhikun@sjtu.edu.cn](mailto:liuzhikun@sjtu.edu.cn)

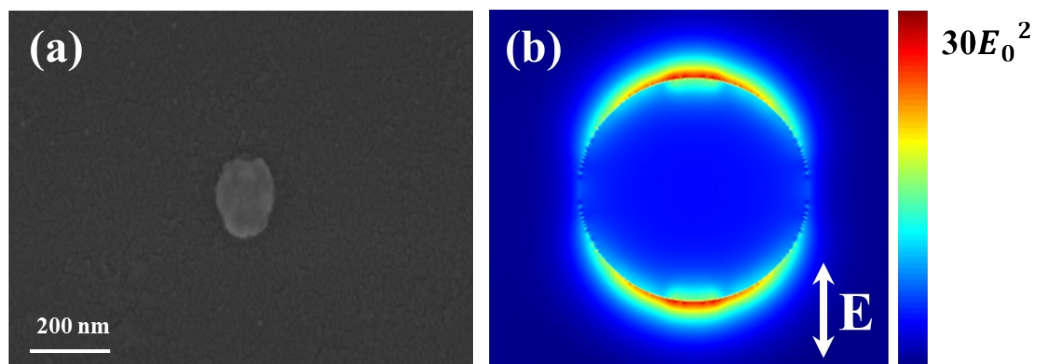

**Figure S1.** SEM image of Ag nanoparticle and FDTD simulated localized surface plasmon effects.

(a) Ag nanoparticles fabricated on an alumina substrate by electron-beam lithography. (b) Simulated near-field distribution at a plane 2 nm above the substrate, showing the localized surface plasmon enhancement of the Ag nanoparticles under illumination with a wavelength of 343 nm, obtained using FDTD simulations.

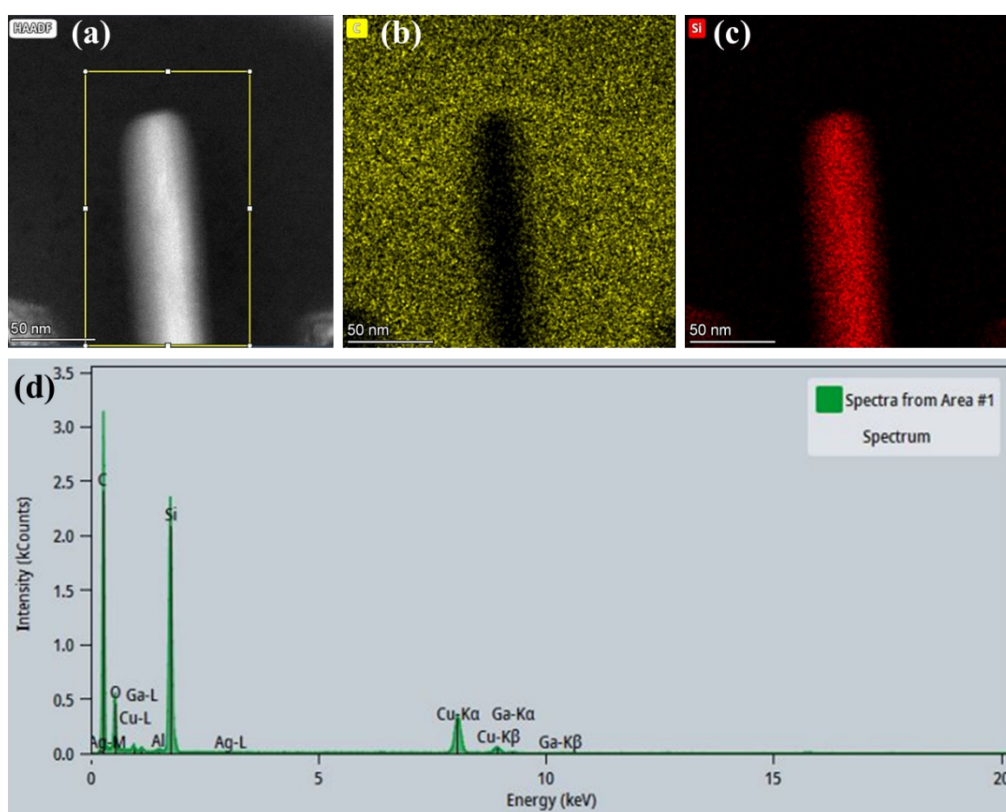

**Figure S2.** Elemental analysis of the silicon nanostructures. (a–c) HAADF-STEM image and corresponding elemental mapping of the silicon nanostructures. (d) EDS spectrum of the analyzed region. The absence of the Ag-L peak in the X-ray spectrum indicates that no silver element was detected in the silicon nanostructures.

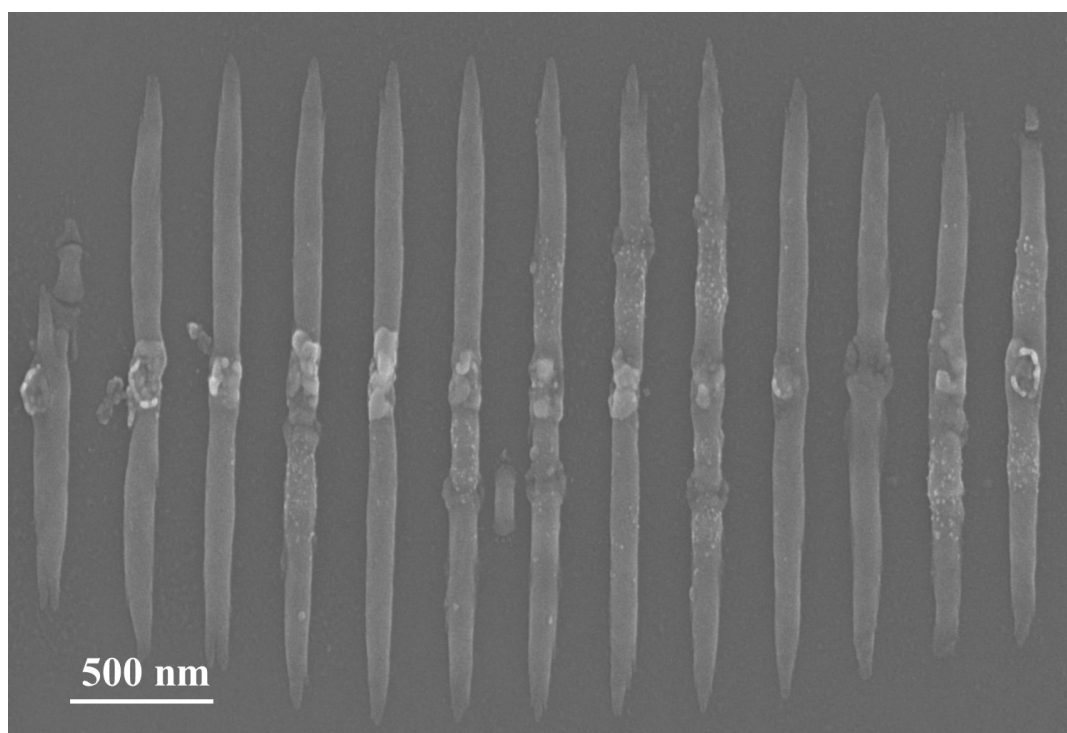

**Figure S3.** SEM image of silicon nanostructures grown on Fe nanoparticles, aligned with the laser polarization.

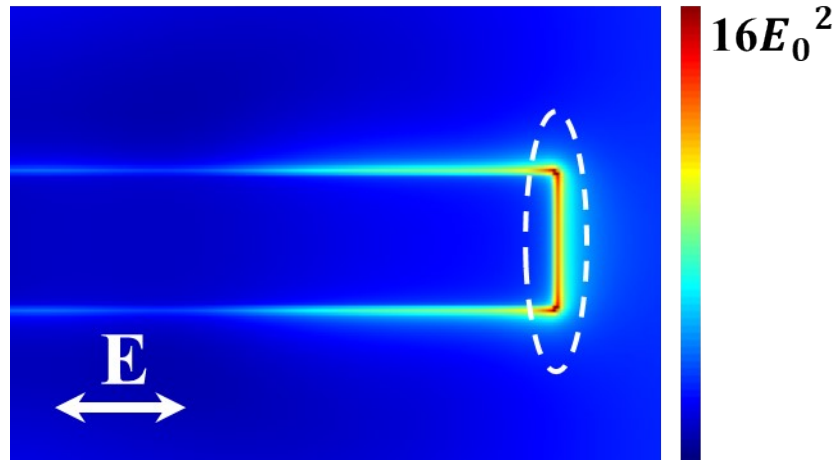

**Figure S4.** Simulated near-field distribution at the silicon growth front for growth aligned with the polarization direction.

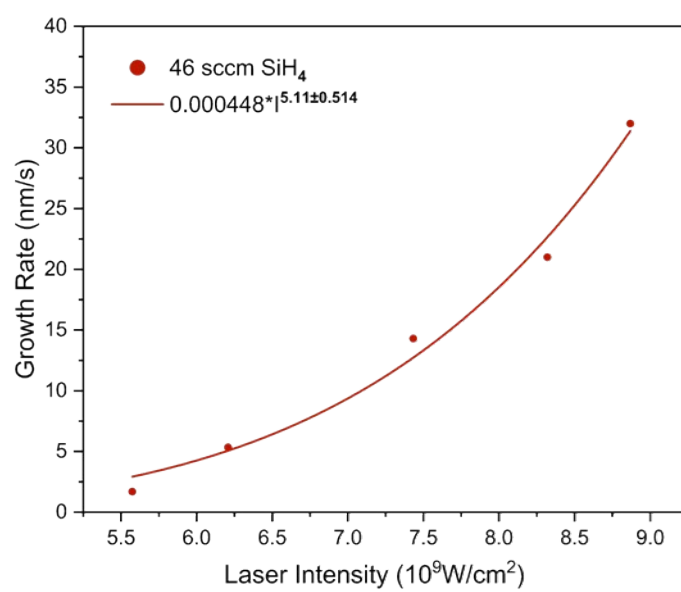

**Figure S5.** Growth rate as a function of the peak intensity of incident laser irradiation at 515 nm.

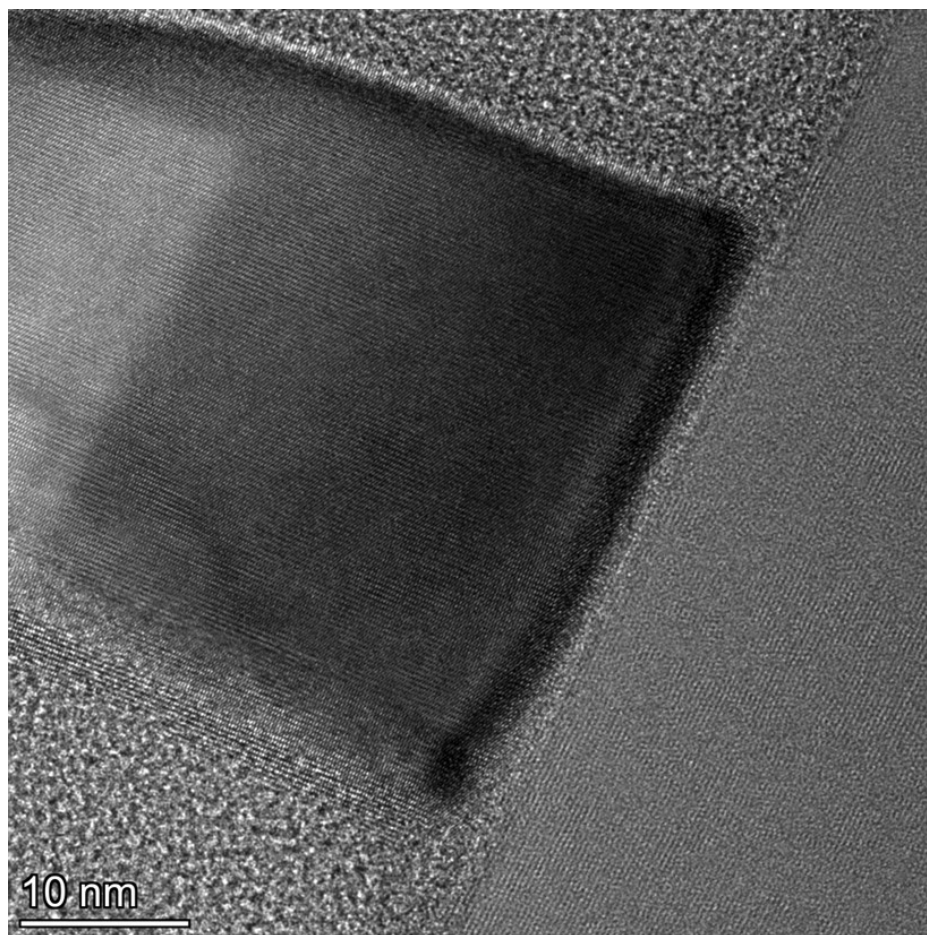

**Figure S6.** HRTEM image of silicon nanostructures grown on a silicon substrate. The inconsistency in lattice orientations confirms a non-epitaxial growth mode.

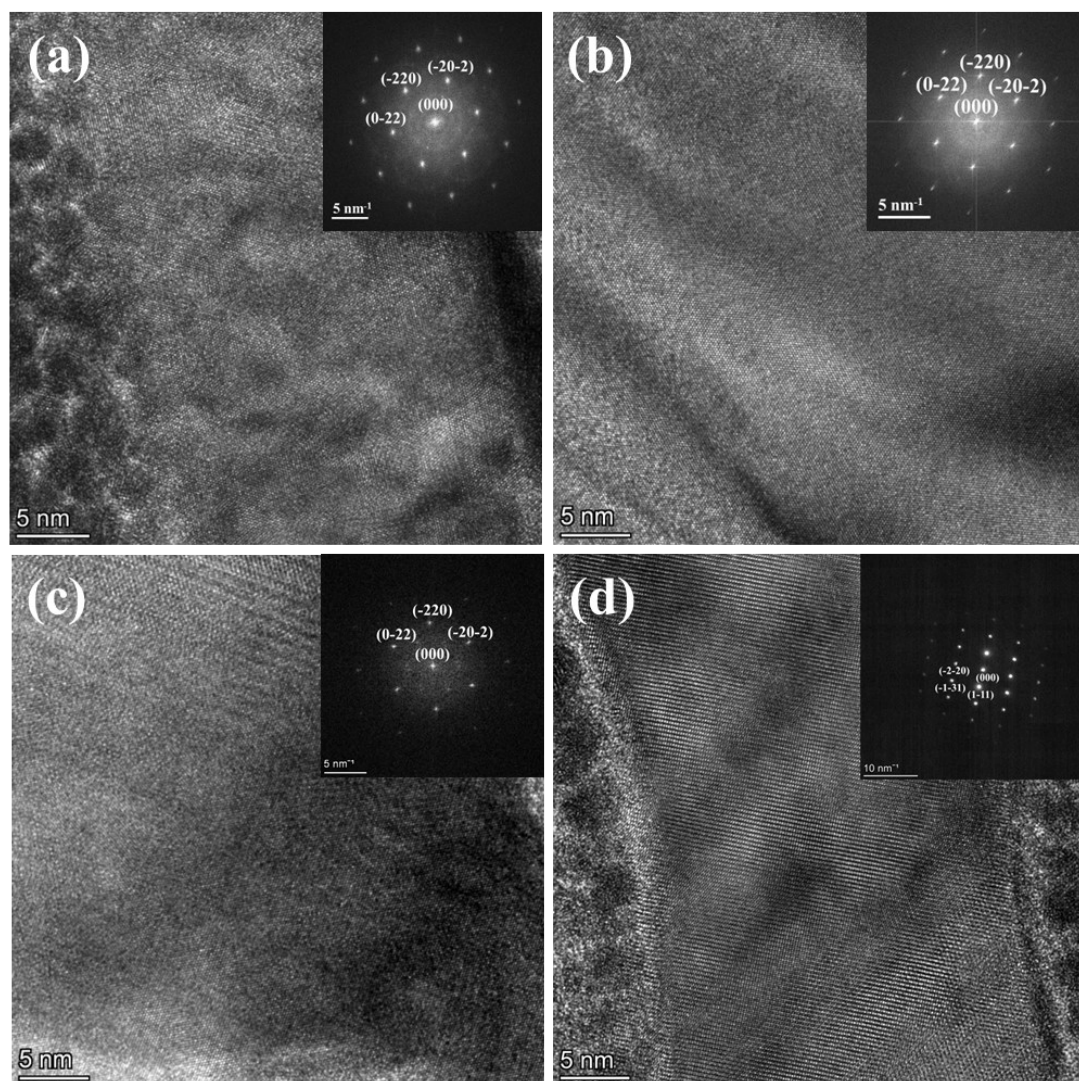

**Figure S7.** Cross-sectional TEM and corresponding FFT images of silicon nanostructures taken perpendicular to the growth (polarization) direction. (a–c) Zone axis  $[-111]$ ; (d) Zone axis  $[-112]$ .



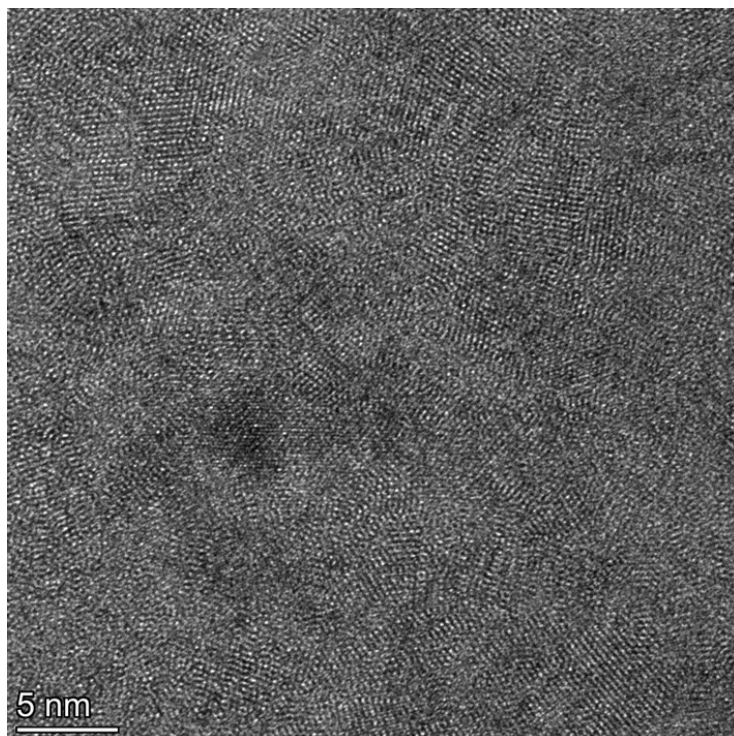

**Figure S8.** High-resolution transmission electron microscopy (HRTEM) image of silicon nanostructures grown under 515 nm wavelength laser irradiation at a relatively low intensity ( $5 \times 10^9 \text{ W m}^{-2}$ ).

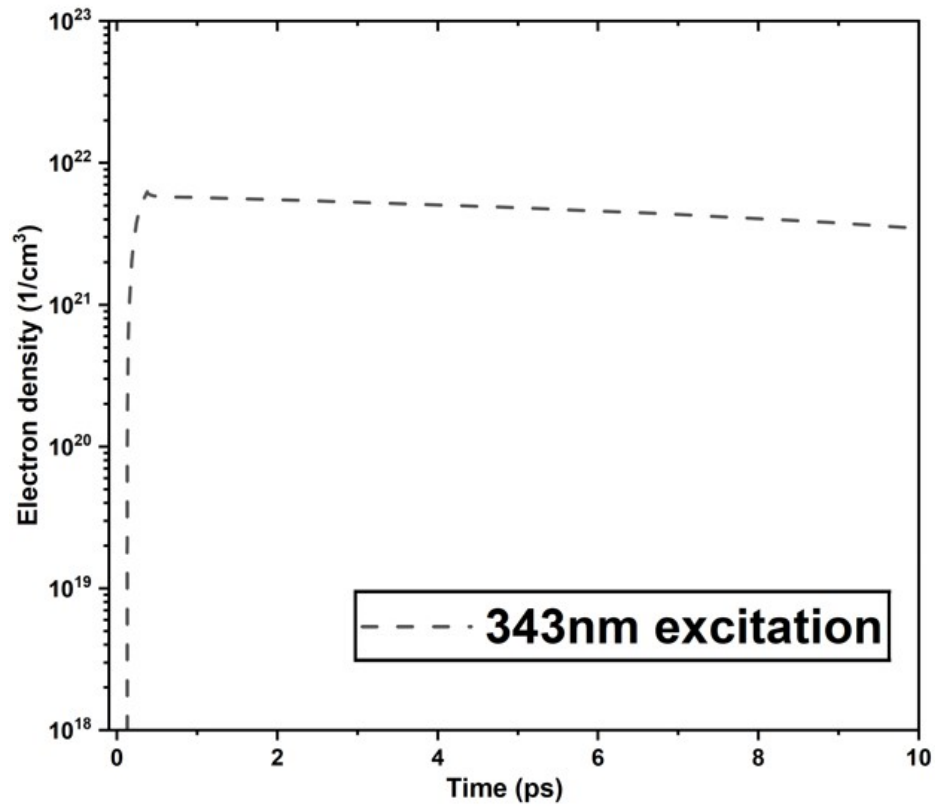

**Figure S9.** Carrier density evolution on the surface of silicon nanostructures under 343 nm laser irradiation, calculated using the two-temperature model.

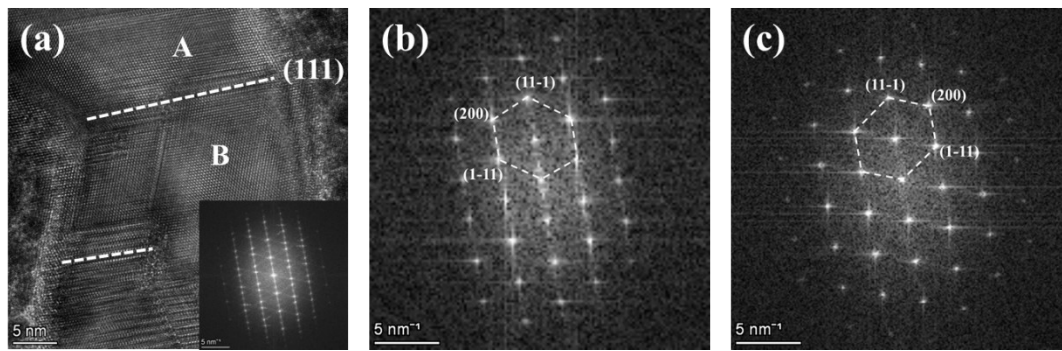

**Figure S10.** TEM characterization of silicon nanostructures grown on a silicon substrate.  
 (a) High-resolution TEM image of a twin boundary within the silicon nanostructures and the corresponding selected area electron diffraction (SAED) pattern. The zone axis is  $[110]$ .  
 (b–c) SAED patterns of adjacent twin regions A and B.
